# Supplementary material for: ﻿The aquatic Adephaga of the Makay, central-western Madagascar, with description of two new diving beetle species (Coleoptera, Gyrinidae, Haliplidae, Noteridae, Dytiscidae)
Source: Zookeys. 2022 Nov 2;1127:1–60. doi: 10.3897/zookeys.1127.85737 (PMC9881503; doi:10.3897/zookeys.1127.85737)
Supplement: Supplementary material 1 — Table S1 [file zookeys-1127-001_article-85737__-s001.xls]

## Sheet: abondance_site
species	MAK-1	MAK-2	MAK-3	MAK-4	MAK-5	MAK-6	MAK-7	MAK-8	MAK-9	MAK-10	MAK-11	MAK-12	MAK-13	MAK-14	MAK-15	MAK-16	MAK-17	MAK-18	MAK-19	MAK-20	MAK-21	MAK-22	MAK-23	MAK-24	MAK-25	MAK-26	MAK-27	MAK-28	MAK-29	MAK-30	MAK-31	MAK-32	MAK-33	MAK-34	MAK-35	MAK-36	MAK-37	MAK-38	MAK-39	MAK-40	MAK-41	MAK-42	MAK-43	MAK-44	MAK-45	MAK-46	MAK-47	MAK-48	MAK-49
Dineutus proximus	0	0	0	0	5	0	0	0	0	0	0	0	2	5	0	0	0	0	0	0	0	0	0	3	0	0	11	0	0	1	0	0	0	0	1	0	4	0	0	7	0	0	0	0	0	0	0	6	0
D. sinuosipennis	0	0	0	0	0	0	0	0	0	0	0	0	0	0	0	0	0	0	0	0	0	0	0	0	0	0	5	0	0	0	0	0	0	0	0	0	7	0	0	3	0	0	0	0	0	0	0	1	0
Orectogyrus vicinus	0	0	0	0	0	0	0	0	0	0	0	0	0	0	1	0	0	0	0	0	0	0	0	0	0	0	0	0	0	0	0	0	0	0	0	5	13	0	0	1	0	0	0	0	0	0	0	4	0
Peltodytes quadratus	0	0	0	0	0	0	0	0	0	0	0	0	0	0	0	0	0	0	1	0	0	0	0	0	0	0	0	0	0	0	0	0	0	0	0	0	0	0	0	0	1	0	0	0	0	0	0	0	0
Canthydrus concolor	0	1	0	0	0	0	0	0	0	0	0	0	0	0	0	0	0	0	0	0	0	0	0	0	0	0	0	0	0	0	0	0	0	0	0	0	0	0	0	0	0	0	0	0	0	0	0	0	0
C. flavosignatus	0	2	0	0	0	0	0	0	0	0	0	0	0	0	0	0	0	0	1	0	0	0	0	0	0	0	0	0	0	0	0	0	0	0	0	0	0	0	0	0	0	0	0	0	0	0	0	0	0
C. guttula	3	1	0	0	0	0	0	0	0	0	1	0	0	0	0	0	0	0	91	1	0	0	0	0	0	0	0	0	0	0	0	0	0	0	0	0	0	3	0	4	6	12	0	0	0	0	0	0	0
C. sp. Ma5	0	0	0	0	0	0	0	0	0	0	0	0	0	0	0	0	0	0	0	1	0	0	0	0	0	0	0	0	0	0	0	0	0	0	0	0	0	0	0	0	0	0	0	0	0	0	0	0	0
Neohydrocoptus seriatus	0	2	0	0	0	0	0	0	0	0	1	0	0	0	0	0	0	0	24	0	3	0	20	0	0	0	0	0	0	0	0	0	0	0	0	0	0	1	0	0	0	3	18	6	0	0	0	0	0
N. sp. Ma3	0	0	0	0	0	0	0	0	0	0	0	0	0	0	0	0	0	0	0	0	0	0	0	0	0	0	0	0	0	0	0	0	0	0	0	0	0	0	0	0	0	0	5	2	0	0	0	0	0
Sternocanthus fabiennae	0	0	0	0	0	0	0	0	0	0	0	0	0	0	0	0	0	0	5	0	0	0	0	0	0	0	0	0	0	0	0	0	0	0	0	0	0	0	0	0	2	0	0	0	0	0	0	0	0
Synchortus asperatus	0	0	0	0	0	0	0	0	0	0	0	0	0	0	0	0	0	0	0	0	1	0	0	0	0	0	0	0	0	0	0	0	0	0	0	0	0	0	0	0	0	1	0	0	0	0	0	0	0
Copelatus acamas	0	0	0	0	0	2	3	0	0	0	0	0	0	1	0	0	0	0	0	0	0	0	0	0	0	0	0	0	0	20	0	35	0	8	3	0	0	0	1	0	0	0	0	0	67	17	1	0	70
C. andobonicus	0	0	0	0	0	0	0	0	0	0	0	4	0	0	0	0	0	0	0	0	0	0	0	0	0	0	0	0	0	0	0	0	2	0	0	0	0	0	0	0	0	0	0	0	0	0	0	0	0
C. polystrigus	0	0	0	0	0	0	0	0	0	0	2	78	0	0	0	0	0	0	0	0	0	0	0	0	0	0	0	0	0	0	0	0	4	0	0	0	0	0	0	0	0	0	0	81	0	0	0	0	0
C. ruficapillus	0	0	9	11	0	0	1	1	0	16	1	10	0	0	0	2	0	0	0	0	0	0	0	0	2	0	0	8	1	0	0	0	2	1	4	0	0	4	17	0	0	0	0	0	1	0	0	0	0
C. vigintistriatus	0	0	0	0	0	0	0	0	0	0	0	0	0	0	0	0	0	0	0	0	0	0	0	0	0	0	0	0	0	0	0	0	0	0	0	0	0	0	0	0	0	0	0	5	0	0	0	0	0
C. sp. Ma19	0	0	0	0	0	0	0	0	0	0	0	0	0	0	0	0	0	0	0	0	0	0	0	0	0	0	0	0	0	0	0	0	0	0	0	0	0	0	0	0	0	0	0	1	0	0	0	0	0
C. sp. Ma20	0	0	0	0	0	0	0	0	0	0	0	0	0	0	0	0	0	0	0	0	0	0	0	0	0	0	0	0	0	0	0	0	0	0	0	0	0	0	0	0	0	0	0	0	0	2	0	0	0
Madaglymbus fairmairei	0	0	3	0	0	0	0	0	0	10	2	4	0	0	1	2	0	0	0	0	0	0	0	0	10	0	0	0	4	0	0	0	0	0	1	0	1	0	6	1	0	0	0	0	0	0	0	0	0
Cybister cinctus	1	2	0	0	0	0	0	0	0	0	0	0	0	0	0	0	0	0	4	5	0	0	1	0	0	0	0	0	0	0	0	0	0	0	0	0	0	0	0	0	1	0	0	0	0	0	0	0	0
C. operosus	0	0	0	0	0	0	0	0	0	0	0	0	0	0	0	0	0	0	0	0	0	0	0	0	0	0	0	0	0	0	0	0	0	0	0	0	0	0	0	0	0	0	0	0	0	0	0	0	0
Rhantaticus congestus	0	1	0	0	0	0	0	0	0	0	0	0	0	0	0	0	0	0	2	0	0	0	0	0	0	0	0	0	0	0	0	0	0	0	0	0	0	0	0	0	1	0	0	0	0	0	0	0	0
Eretes griseus	0	0	0	0	0	0	0	0	0	0	2	0	0	0	0	0	0	0	0	0	0	0	0	0	0	0	0	0	0	0	0	0	0	0	0	0	0	0	0	0	0	0	0	0	0	0	0	0	0
Hydaticus dorsiger	0	0	0	0	0	0	0	0	0	0	2	2	0	1	0	0	0	1	14	0	0	0	1	0	0	0	0	0	0	0	0	0	0	0	0	0	0	0	0	0	0	0	0	0	0	0	0	0	0
H. exclamationis	0	0	0	0	0	0	0	0	0	0	1	0	0	0	0	0	0	0	0	0	0	0	0	0	0	0	0	0	0	0	0	0	0	0	0	0	0	0	0	0	0	0	0	0	0	0	0	0	0
H. petitii	0	0	0	0	0	0	0	0	0	0	0	0	0	0	0	0	0	0	0	0	0	0	0	0	0	0	0	0	0	0	0	0	0	0	0	0	0	0	0	0	0	0	0	0	0	0	0	0	0
H. servillianus	1	1	0	0	0	0	0	0	0	0	0	0	0	0	0	0	0	0	20	0	0	0	4	0	0	0	0	0	0	0	0	0	0	0	0	0	0	0	0	2	0	0	0	0	0	0	0	0	0
H. sobrinus	0	0	0	0	0	0	0	1	0	0	0	0	0	0	0	0	0	0	0	0	0	0	0	0	0	0	0	0	0	0	0	0	0	0	0	0	0	0	0	0	0	0	0	0	0	0	0	0	0
Bidessus longistriga	1	1	0	0	0	0	0	0	0	0	0	0	0	0	0	0	0	0	2	0	0	0	0	0	0	0	0	0	0	0	0	0	0	0	0	0	0	0	0	0	0	17	0	0	0	0	0	0	0
B. perexiguus	1	5	0	0	0	0	0	0	0	0	0	0	0	0	0	0	1	82	29	0	0	0	0	0	0	0	0	0	0	0	0	0	0	0	0	0	0	0	0	0	0	0	0	0	0	0	0	0	0
Clypeodytes concivis	0	6	0	0	0	0	0	0	0	0	0	0	0	0	0	0	0	0	0	0	0	0	0	0	0	0	0	0	0	0	0	0	0	0	0	0	0	0	0	0	0	0	0	0	0	0	0	0	0
C. insularis	0	0	0	0	0	0	0	0	0	0	0	0	0	0	0	0	0	0	0	1	0	0	0	0	0	0	0	0	0	0	0	0	0	0	0	0	0	0	0	0	0	0	0	0	0	0	0	0	0
C. sp. Ma3	0	1	0	0	0	0	0	0	0	0	0	0	0	0	0	0	0	0	0	0	0	0	0	0	0	0	0	0	0	0	0	0	0	0	0	0	0	0	0	0	0	0	0	0	0	0	0	0	0
Hydroglyphus capitatus	33	0	0	2	0	0	0	0	0	0	0	0	0	0	0	0	0	0	0	0	0	0	0	0	0	0	0	0	0	0	0	0	0	0	0	0	0	0	0	0	0	0	0	0	0	0	0	0	0
H. geminodes	9	3	0	9	0	0	0	0	0	0	0	0	0	0	0	0	12	1	7	0	0	0	0	0	0	0	0	0	0	0	0	0	0	0	0	0	0	0	0	0	0	0	0	0	0	0	0	0	0
H. plagiatus	0	0	0	0	0	0	0	0	0	0	0	0	0	0	0	0	1	0	0	0	0	0	0	0	0	0	0	0	0	0	0	0	0	0	0	0	0	0	0	0	0	0	0	0	0	0	0	0	0
Liodessus luteopictus	0	0	0	0	0	0	0	0	0	0	0	0	0	0	0	1	0	0	0	0	0	0	0	0	0	0	0	0	0	0	0	0	0	0	0	0	0	0	0	0	0	0	0	0	0	0	0	0	0
Pachynectes costulifer	58	0	0	0	0	0	0	0	0	0	0	0	0	0	0	0	0	0	0	2	0	2	0	0	0	0	0	0	0	0	0	0	0	0	0	0	0	0	0	0	0	0	0	0	0	0	0	0	0
P. sp. Ma1	0	7	47	12	12	0	0	2	0	0	0	0	0	43	0	10	0	0	0	0	0	0	0	0	0	0	0	24	24	0	0	0	0	0	0	3	91	3	0	53	0	0	1	1	2	0	28	0	5
P. sp. Ma4	0	0	0	0	3	0	0	0	0	0	0	0	0	5	0	0	0	0	0	0	0	0	0	0	0	0	0	0	2	0	0	0	0	0	0	0	0	0	0	0	0	0	0	0	1	0	0	0	0
Pseuduvarus sp. Ma1	0	1	0	0	0	0	0	0	0	0	0	0	0	0	0	0	0	0	0	0	0	0	0	0	0	0	0	0	0	0	0	0	0	0	0	0	0	0	0	0	0	0	0	0	0	0	0	0	0
Uvarus betsimisarakus	0	0	0	0	0	0	0	0	0	0	0	0	0	0	0	0	0	0	2	0	0	0	0	0	0	0	0	0	0	0	0	0	0	0	0	0	0	0	0	0	0	0	0	0	0	0	0	0	0
U. rivulorum	1	2	0	0	0	0	0	0	0	0	0	0	0	0	0	0	0	1	6	0	0	0	0	0	0	0	0	0	0	0	0	0	0	0	0	0	0	0	0	0	0	0	0	0	0	0	0	0	0
Yola costipennis	7	0	0	0	0	0	0	0	0	0	0	0	0	0	0	0	0	0	4	6	0	0	0	0	0	0	0	0	0	0	0	0	0	0	0	0	0	0	0	0	4	1	0	0	0	0	0	0	0
Hydrovatus acuminatus	2	12	1	0	0	0	0	0	0	0	0	0	0	0	0	0	0	0	3	0	3	0	1	0	0	0	0	0	0	0	0	0	0	0	0	0	0	0	0	0	0	0	0	1	0	0	0	0	0
H. capnius	0	1	0	0	0	0	0	0	0	0	0	0	0	0	0	0	0	0	0	0	0	0	0	0	0	0	0	0	0	0	0	0	0	0	0	0	0	0	0	0	0	2	0	0	0	0	0	0	0
H. crassicornis	0	0	0	0	0	0	0	0	0	0	0	0	0	0	0	0	0	0	0	0	0	0	0	0	0	0	0	0	0	0	0	0	0	0	0	0	0	0	0	0	0	2	0	0	0	0	0	0	0
H. cruentatus	0	1	0	0	0	0	0	0	0	0	0	0	0	0	0	0	0	0	0	0	0	0	0	0	0	0	0	0	0	0	0	0	0	0	0	0	0	0	0	0	0	1	0	0	0	0	0	0	0
H. dentatus	0	1	0	0	0	0	0	0	0	0	0	0	0	0	0	0	0	0	0	0	0	0	0	0	0	0	0	0	0	0	0	0	0	0	0	0	0	0	0	0	0	0	0	0	0	0	0	0	0
H. otiosus	0	5	0	0	0	0	0	0	0	0	0	0	0	0	0	0	0	0	0	0	0	0	0	0	0	0	0	0	0	0	0	0	0	0	0	0	0	0	0	0	0	0	0	0	0	0	0	0	0
H. parvulus	0	2	0	0	0	0	0	0	0	0	0	0	0	0	0	0	0	0	0	0	0	0	0	0	0	0	0	0	0	0	0	0	0	0	0	0	0	0	0	0	0	0	2	0	0	0	0	0	0
H. pictulus	0	6	0	0	0	0	0	0	0	0	0	0	0	0	0	0	0	0	0	0	0	0	0	0	0	0	0	0	0	0	0	0	0	0	0	0	0	0	0	0	0	0	0	0	0	0	0	0	0
H. testudinarius	0	10	0	0	0	0	0	0	0	0	0	0	0	0	0	0	0	0	0	0	0	0	0	0	0	0	0	0	0	0	0	0	0	0	0	0	0	0	0	0	0	0	0	0	0	0	0	0	0
H. sp. Ma7	0	2	0	0	0	0	0	0	0	0	0	0	0	0	0	0	0	0	0	0	0	0	0	0	0	0	0	0	0	0	0	0	0	0	0	0	0	0	0	0	0	0	0	0	0	0	0	0	0
Hyphydrus separandus	0	0	10	2	138	0	0	11	0	1	1	0	0	8	0	1	0	0	0	0	0	0	0	0	2	0	0	4	14	0	0	0	0	0	1	0	2	0	0	6	0	0	0	0	0	0	0	0	0
H. stipes	0	0	0	0	0	0	0	0	0	0	0	0	0	0	0	0	0	0	0	0	0	0	0	0	0	0	0	0	1	0	0	0	0	0	0	0	0	0	0	0	0	0	0	0	0	0	0	0	0
Methles sp. Ma1	0	0	0	0	0	0	0	0	0	0	0	0	0	0	0	0	0	0	0	0	0	0	0	0	0	0	0	0	0	0	0	0	0	0	0	0	0	0	0	0	0	0	0	7	0	0	0	0	0
M. sp. Ma5	0	1	0	0	0	0	0	0	0	0	0	0	0	0	0	0	0	0	0	0	0	0	0	0	0	0	0	0	0	0	0	0	0	0	0	0	0	0	0	0	0	6	1	1	0	0	0	0	0
Africophilus bartolozzii	0	0	0	0	0	0	0	1	16	0	0	0	0	0	0	0	0	0	0	0	0	0	0	0	0	0	0	0	0	0	0	0	0	0	0	1	0	0	1	0	0	0	0	0	0	0	0	0	0
A. nesiotes	0	0	0	0	14	0	0	1	0	0	0	0	2	7	0	0	0	0	0	0	0	0	0	0	0	1	0	0	0	0	0	0	0	0	0	0	0	0	1	2	0	0	0	0	0	0	0	0	0
Laccophilus addendus	0	1	0	0	1	0	0	0	0	0	47	0	0	0	0	0	0	0	3	0	0	0	0	0	3	1	0	0	0	0	0	0	0	0	0	0	0	1	0	0	0	0	0	0	0	0	0	0	0
L. flaveolus	0	1	0	0	0	0	0	0	0	0	0	0	0	0	0	0	0	0	0	0	0	0	0	0	0	0	0	0	0	0	0	0	0	0	0	0	0	0	0	0	0	0	0	0	0	0	0	0	0
L. insularum	0	0	0	0	4	0	0	0	0	0	0	0	0	0	0	0	0	0	0	0	0	0	0	0	0	0	0	0	0	0	0	0	0	0	0	0	0	0	0	0	0	0	0	0	0	0	0	0	0
L. luctuosus	0	0	0	0	0	0	0	0	0	0	0	0	0	0	0	0	0	0	0	0	2	0	0	0	0	0	0	0	0	0	0	0	0	0	0	0	0	0	0	0	0	0	0	0	0	0	0	0	0
L. makay	0	0	15	3	17	3	2	20	0	6	0	0	0	19	5	2	0	0	0	0	0	0	0	0	33	2	0	8	1	7	20	22	5	6	23	11	0	19	6	0	0	0	0	1	68	7	10	0	21
L. pallescens	1	13	0	0	0	0	0	0	0	0	0	0	0	0	0	0	0	1	1	0	0	0	0	0	0	0	0	0	0	0	0	0	0	0	0	0	0	0	0	0	0	0	0	0	0	0	0	0	0
L. posticus	5	1	1	3	0	0	0	0	0	0	8	0	0	0	0	0	1	1	243	0	1	0	12	0	0	0	0	1	0	0	0	0	0	0	0	0	0	0	0	3	25	37	0	1	0	0	0	0	0
L. rivulosus	0	1	0	0	0	0	0	0	0	0	0	0	0	0	0	0	0	0	9	0	0	0	0	0	0	0	0	0	0	0	0	0	0	0	0	0	0	0	0	0	0	0	0	0	0	0	0	0	0
L. seyrigi	0	1	0	0	0	0	0	0	0	0	0	0	0	0	0	0	0	0	0	0	0	0	0	0	0	0	0	0	0	0	0	0	0	0	0	0	0	0	0	0	0	0	0	0	0	0	0	0	0
L. transversovittatus	0	0	0	0	0	0	0	0	0	0	0	2	0	0	0	0	0	0	0	0	0	0	0	0	0	1	0	0	0	0	0	0	0	0	0	0	0	0	0	0	0	0	0	0	0	0	0	0	0
L. sp. Ma19	0	0	0	0	0	0	0	0	0	0	0	0	0	0	0	0	0	0	0	0	1	0	0	0	0	0	0	0	0	0	0	0	0	0	0	0	0	0	0	0	0	0	0	0	0	0	0	0	0
Neptosternus oblongus	0	0	0	0	88	0	0	0	0	0	0	0	0	0	0	0	0	0	0	0	0	0	0	0	0	0	0	0	0	0	0	0	0	0	0	0	0	0	0	0	0	0	0	0	0	0	0	0	0
Philaccolus elongatus	0	1	0	0	0	0	0	0	0	0	0	0	0	0	0	0	0	0	0	0	0	0	0	0	0	0	0	0	0	0	0	0	0	0	0	0	0	0	0	0	0	0	0	0	0	0	0	0	0
[truncated: 13 more columns]

## Sheet: ab_periph
species	MAK-1	MAK-2	MAK-18	MAK-19	MAK-20	MAK-21	MAK-22	MAK-23	MAK-41	MAK-42	MAK-61	MAK-62
Dineutus proximus	0	0	0	0	0	0	0	0	0	0	0	0	0
D. sinuosipennis	0	0	0	0	0	0	0	0	0	0	0	0	0
Orectogyrus vicinus	0	0	0	0	0	0	0	0	0	0	0	0	0
Peltodytes quadratus	0	0	0	1	0	0	0	0	1	0	0	0	2
Canthydrus concolor	0	1	0	0	0	0	0	0	0	0	0	0	1
C. flavosignatus	0	2	0	1	0	0	0	0	0	0	0	0	3
C. guttula	3	1	0	91	1	0	0	0	6	12	1	0	115
C. sp. Ma5	0	0	0	0	1	0	0	0	0	0	3	0	4
Neohydrocoptus seriatus	0	2	0	24	0	3	0	20	0	3	2	0	54
N. sp. Ma3	0	0	0	0	0	0	0	0	0	0	0	0	0
Sternocanthus fabiennae	0	0	0	5	0	0	0	0	2	0	0	0	7
Synchortus asperatus	0	0	0	0	0	1	0	0	0	1	0	0	2
Copelatus acamas	0	0	0	0	0	0	0	0	0	0	0	0	0
C. andobonicus	0	0	0	0	0	0	0	0	0	0	0	0	0
C. polystrigus	0	0	0	0	0	0	0	0	0	0	0	0	0
C. ruficapillus	0	0	0	0	0	0	0	0	0	0	0	0	0
C. vigintistriatus	0	0	0	0	0	0	0	0	0	0	0	0	0
C. sp. Ma19	0	0	0	0	0	0	0	0	0	0	0	0	0
C. sp. Ma20	0	0	0	0	0	0	0	0	0	0	0	0	0
Madaglymbus fairmairei	0	0	0	0	0	0	0	0	0	0	0	0	0
Cybister cinctus	1	2	0	4	5	0	0	1	1	0	0	0	14
C. operosus	0	0	0	0	0	0	0	0	0	0	0	0	0
Rhantaticus congestus	0	1	0	2	0	0	0	0	1	0	0	0	4
Eretes griseus	0	0	0	0	0	0	0	0	0	0	0	0	0
Hydaticus dorsiger	0	0	1	14	0	0	0	1	0	0	0	0	16
H. exclamationis	0	0	0	0	0	0	0	0	0	0	0	0	0
H. petitii	0	0	0	0	0	0	0	0	0	0	0	0	0
H. servillianus	1	1	0	20	0	0	0	4	0	0	7	1	34
H. sobrinus	0	0	0	0	0	0	0	0	0	0	0	0	0
Bidessus longistriga	1	1	0	2	0	0	0	0	0	17	1	0	22
B. perexiguus	1	5	82	29	0	0	0	0	0	0	1	0	118
Clypeodytes concivis	0	6	0	0	0	0	0	0	0	0	1	0	7
C. insularis	0	0	0	0	1	0	0	0	0	0	0	0	1
C. sp. Ma3	0	1	0	0	0	0	0	0	0	0	0	0	1
Hydroglyphus capitatus	33	0	0	0	0	0	0	0	0	0	5	0	38
H. geminodes	9	3	1	7	0	0	0	0	0	0	5	0	25
H. plagiatus	0	0	0	0	0	0	0	0	0	0	0	0	0
Liodessus luteopictus	0	0	0	0	0	0	0	0	0	0	0	0	0
Pachynectes costulifer	58	0	0	0	2	0	2	0	0	0	0	0	62
P. sp. Ma1	0	7	0	0	0	0	0	0	0	0	0	0	7
P. sp. Ma4	0	0	0	0	0	0	0	0	0	0	0	0	0
Pseuduvarus sp. Ma1	0	1	0	0	0	0	0	0	0	0	1	0	2
Uvarus betsimisarakus	0	0	0	2	0	0	0	0	0	0	0	0	2
U. rivulorum	1	2	1	6	0	0	0	0	0	0	0	0	10
Yola costipennis	7	0	0	4	6	0	0	0	4	1	0	3	25
Hydrovatus acuminatus	2	12	0	3	0	3	0	1	0	0	2	1	24
H. capnius	0	1	0	0	0	0	0	0	0	2	0	0	3
H. crassicornis	0	0	0	0	0	0	0	0	0	2	2	0	4
H. cruentatus	0	1	0	0	0	0	0	0	0	1	0	0	2
H. dentatus	0	1	0	0	0	0	0	0	0	0	0	0	1
H. otiosus	0	5	0	0	0	0	0	0	0	0	0	4	9
H. parvulus	0	2	0	0	0	0	0	0	0	0	3	0	5
H. pictulus	0	6	0	0	0	0	0	0	0	0	0	1	7
H. testudinarius	0	10	0	0	0	0	0	0	0	0	0	0	10
H. sp. Ma7	0	2	0	0	0	0	0	0	0	0	0	0	2
Hyphydrus separandus	0	0	0	0	0	0	0	0	0	0	0	0	0
H. stipes	0	0	0	0	0	0	0	0	0	0	0	0	0
Methles sp. Ma1	0	0	0	0	0	0	0	0	0	0	0	0	0
M. sp. Ma5	0	1	0	0	0	0	0	0	0	6	43	4	54
Africophilus bartolozzii	0	0	0	0	0	0	0	0	0	0	0	0	0
A. nesiotes	0	0	0	0	0	0	0	0	0	0	0	0	0
Laccophilus addendus	0	1	0	3	0	0	0	0	0	0	0	2	6
L. flaveolus	0	1	0	0	0	0	0	0	0	0	0	0	1
L. insularum	0	0	0	0	0	0	0	0	0	0	0	0	0
L. luctuosus	0	0	0	0	0	2	0	0	0	0	0	0	2
L. makay	0	0	0	0	0	0	0	0	0	0	0	0	0
L. pallescens	1	13	1	1	0	0	0	0	0	0	0	0	16
L. posticus	5	1	1	243	0	1	0	12	25	37	0	7	332
L. rivulosus	0	1	0	9	0	0	0	0	0	0	0	0	10
L. seyrigi	0	1	0	0	0	0	0	0	0	0	0	0	1
L. transversovittatus	0	0	0	0	0	0	0	0	0	0	0	0	0
L. sp. Ma19	0	0	0	0	0	1	0	0	0	0	0	0	1
Neptosternus oblongus	0	0	0	0	0	0	0	0	0	0	0	0	0
Philaccolus elongatus	0	1	0	0	0	0	0	0	0	0	0	0	1

## Sheet: ab_iner
species	MAK-3	MAK-4	MAK-5	MAK-6	MAK-7	MAK-8	MAK-9	MAK-10	MAK-11	MAK-12	MAK-13	MAK-14	MAK-15	MAK-16	MAK-17	MAK-24	MAK-25	MAK-26	MAK-27	MAK-28	MAK-29	MAK-30	MAK-31	MAK-32	MAK-33	MAK-34	MAK-35	MAK-36	MAK-37	MAK-38	MAK-39	MAK-40	MAK-43	MAK-44	MAK-45	MAK-46	MAK-47	MAK-48	MAK-49	MAK-50	MAK-51	MAK-52	MAK-53	MAK-54	MAK-55	MAK-56	MAK-57	MAK-58	MAK-59
Dineutus proximus	0	0	5	0	0	0	0	0	0	0	2	5	0	0	0	3	0	0	11	0	0	1	0	0	0	0	1	0	4	0	0	7	0	0	0	0	0	6	0	0	0	0	0	0	3	0	0	0	6
D. sinuosipennis	0	0	0	0	0	0	0	0	0	0	0	0	0	0	0	0	0	0	5	0	0	0	0	0	0	0	0	0	7	0	0	3	0	0	0	0	0	1	0	0	0	6	0	0	14	0	0	1	0
Orectogyrus vicinus	0	0	0	0	0	0	0	0	0	0	0	0	1	0	0	0	0	0	0	0	0	0	0	0	0	0	0	5	13	0	0	1	0	0	0	0	0	4	0	0	0	0	0	0	0	0	0	0	0
Peltodytes quadratus	0	0	0	0	0	0	0	0	0	0	0	0	0	0	0	0	0	0	0	0	0	0	0	0	0	0	0	0	0	0	0	0	0	0	0	0	0	0	0	0	0	0	0	0	0	0	0	0	0
Canthydrus concolor	0	0	0	0	0	0	0	0	0	0	0	0	0	0	0	0	0	0	0	0	0	0	0	0	0	0	0	0	0	0	0	0	0	0	0	0	0	0	0	0	0	0	0	0	0	0	0	0	0
C. flavosignatus	0	0	0	0	0	0	0	0	0	0	0	0	0	0	0	0	0	0	0	0	0	0	0	0	0	0	0	0	0	0	0	0	0	0	0	0	0	0	0	0	0	0	0	0	0	0	0	0	0
C. guttula	0	0	0	0	0	0	0	0	1	0	0	0	0	0	0	0	0	0	0	0	0	0	0	0	0	0	0	0	0	3	0	4	0	0	0	0	0	0	0	0	0	0	0	0	0	0	0	0	0
C. sp. Ma5	0	0	0	0	0	0	0	0	0	0	0	0	0	0	0	0	0	0	0	0	0	0	0	0	0	0	0	0	0	0	0	0	0	0	0	0	0	0	0	0	0	0	0	0	0	0	0	0	0
Neohydrocoptus seriatus	0	0	0	0	0	0	0	0	1	0	0	0	0	0	0	0	0	0	0	0	0	0	0	0	0	0	0	0	0	1	0	0	18	6	0	0	0	0	0	0	0	0	0	0	0	0	0	0	0
N. sp. Ma3	0	0	0	0	0	0	0	0	0	0	0	0	0	0	0	0	0	0	0	0	0	0	0	0	0	0	0	0	0	0	0	0	5	2	0	0	0	0	0	0	0	0	0	0	0	5	0	0	0
Sternocanthus fabiennae	0	0	0	0	0	0	0	0	0	0	0	0	0	0	0	0	0	0	0	0	0	0	0	0	0	0	0	0	0	0	0	0	0	0	0	0	0	0	0	0	0	0	0	0	0	0	0	0	0
Synchortus asperatus	0	0	0	0	0	0	0	0	0	0	0	0	0	0	0	0	0	0	0	0	0	0	0	0	0	0	0	0	0	0	0	0	0	0	0	0	0	0	0	0	0	0	0	0	0	0	0	0	0
Copelatus acamas	0	0	0	2	3	0	0	0	0	0	0	1	0	0	0	0	0	0	0	0	0	20	0	35	0	8	3	0	0	0	1	0	0	0	67	17	1	0	70	13	0	1	16	12	0	0	0	0	112
C. andobonicus	0	0	0	0	0	0	0	0	0	4	0	0	0	0	0	0	0	0	0	0	0	0	0	0	2	0	0	0	0	0	0	0	0	0	0	0	0	0	0	0	0	0	0	0	0	0	1	0	0
C. polystrigus	0	0	0	0	0	0	0	0	2	78	0	0	0	0	0	0	0	0	0	0	0	0	0	0	4	0	0	0	0	0	0	0	0	81	0	0	0	0	0	0	0	0	0	0	0	11	37	1	0
C. ruficapillus	9	11	0	0	1	1	0	16	1	10	0	0	0	2	0	0	2	0	0	8	1	0	0	0	2	1	4	0	0	4	17	0	0	0	1	0	0	0	0	2	0	0	0	0	0	0	0	0	0
C. vigintistriatus	0	0	0	0	0	0	0	0	0	0	0	0	0	0	0	0	0	0	0	0	0	0	0	0	0	0	0	0	0	0	0	0	0	5	0	0	0	0	0	0	0	0	0	0	0	1	0	0	0
C. sp. Ma19	0	0	0	0	0	0	0	0	0	0	0	0	0	0	0	0	0	0	0	0	0	0	0	0	0	0	0	0	0	0	0	0	0	1	0	0	0	0	0	0	0	0	0	0	0	0	0	0	0
C. sp. Ma20	0	0	0	0	0	0	0	0	0	0	0	0	0	0	0	0	0	0	0	0	0	0	0	0	0	0	0	0	0	0	0	0	0	0	0	2	0	0	0	1	0	0	0	0	0	0	0	0	0
Madaglymbus fairmairei	3	0	0	0	0	0	0	10	2	4	0	0	1	2	0	0	10	0	0	0	4	0	0	0	0	0	1	0	1	0	6	1	0	0	0	0	0	0	0	0	0	0	0	0	0	0	0	0	0
Cybister cinctus	0	0	0	0	0	0	0	0	0	0	0	0	0	0	0	0	0	0	0	0	0	0	0	0	0	0	0	0	0	0	0	0	0	0	0	0	0	0	0	0	0	0	0	0	0	0	0	0	0
C. operosus	0	0	0	0	0	0	0	0	0	0	0	0	0	0	0	0	0	0	0	0	0	0	0	0	0	0	0	0	0	0	0	0	0	0	0	0	0	0	0	1	0	0	0	0	0	0	0	0	0
Rhantaticus congestus	0	0	0	0	0	0	0	0	0	0	0	0	0	0	0	0	0	0	0	0	0	0	0	0	0	0	0	0	0	0	0	0	0	0	0	0	0	0	0	0	0	0	0	0	0	0	0	0	0
Eretes griseus	0	0	0	0	0	0	0	0	2	0	0	0	0	0	0	0	0	0	0	0	0	0	0	0	0	0	0	0	0	0	0	0	0	0	0	0	0	0	0	0	0	0	0	0	0	0	0	0	0
Hydaticus dorsiger	0	0	0	0	0	0	0	0	2	2	0	1	0	0	0	0	0	0	0	0	0	0	0	0	0	0	0	0	0	0	0	0	0	0	0	0	0	0	0	0	0	0	0	0	0	0	0	0	0
H. exclamationis	0	0	0	0	0	0	0	0	1	0	0	0	0	0	0	0	0	0	0	0	0	0	0	0	0	0	0	0	0	0	0	0	0	0	0	0	0	0	0	0	0	0	0	0	0	0	0	0	0
H. petitii	0	0	0	0	0	0	0	0	0	0	0	0	0	0	0	0	0	0	0	0	0	0	0	0	0	0	0	0	0	0	0	0	0	0	0	0	0	0	0	0	0	1	0	0	0	0	0	0	0
H. servillianus	0	0	0	0	0	0	0	0	0	0	0	0	0	0	0	0	0	0	0	0	0	0	0	0	0	0	0	0	0	0	0	2	0	0	0	0	0	0	0	0	0	0	0	0	0	0	0	0	0
H. sobrinus	0	0	0	0	0	1	0	0	0	0	0	0	0	0	0	0	0	0	0	0	0	0	0	0	0	0	0	0	0	0	0	0	0	0	0	0	0	0	0	2	0	0	2	1	0	0	0	0	2
Bidessus longistriga	0	0	0	0	0	0	0	0	0	0	0	0	0	0	0	0	0	0	0	0	0	0	0	0	0	0	0	0	0	0	0	0	0	0	0	0	0	0	0	0	0	0	0	0	0	0	0	0	0
B. perexiguus	0	0	0	0	0	0	0	0	0	0	0	0	0	0	1	0	0	0	0	0	0	0	0	0	0	0	0	0	0	0	0	0	0	0	0	0	0	0	0	0	0	0	0	0	0	0	0	0	0
Clypeodytes concivis	0	0	0	0	0	0	0	0	0	0	0	0	0	0	0	0	0	0	0	0	0	0	0	0	0	0	0	0	0	0	0	0	0	0	0	0	0	0	0	0	0	0	0	0	0	0	0	0	0
C. insularis	0	0	0	0	0	0	0	0	0	0	0	0	0	0	0	0	0	0	0	0	0	0	0	0	0	0	0	0	0	0	0	0	0	0	0	0	0	0	0	0	0	0	0	0	0	0	0	0	0
C. sp. Ma3	0	0	0	0	0	0	0	0	0	0	0	0	0	0	0	0	0	0	0	0	0	0	0	0	0	0	0	0	0	0	0	0	0	0	0	0	0	0	0	0	0	0	0	0	0	0	0	0	0
Hydroglyphus capitatus	0	2	0	0	0	0	0	0	0	0	0	0	0	0	0	0	0	0	0	0	0	0	0	0	0	0	0	0	0	0	0	0	0	0	0	0	0	0	0	0	0	0	0	0	0	0	0	0	0
H. geminodes	0	9	0	0	0	0	0	0	0	0	0	0	0	0	12	0	0	0	0	0	0	0	0	0	0	0	0	0	0	0	0	0	0	0	0	0	0	0	0	0	0	0	0	0	0	0	0	0	0
H. plagiatus	0	0	0	0	0	0	0	0	0	0	0	0	0	0	1	0	0	0	0	0	0	0	0	0	0	0	0	0	0	0	0	0	0	0	0	0	0	0	0	0	0	0	0	0	0	0	0	0	0
Liodessus luteopictus	0	0	0	0	0	0	0	0	0	0	0	0	0	1	0	0	0	0	0	0	0	0	0	0	0	0	0	0	0	0	0	0	0	0	0	0	0	0	0	0	0	0	0	0	0	0	0	0	0
Pachynectes costulifer	0	0	0	0	0	0	0	0	0	0	0	0	0	0	0	0	0	0	0	0	0	0	0	0	0	0	0	0	0	0	0	0	0	0	0	0	0	0	0	0	0	0	0	0	0	0	0	0	0
P. sp. Ma1	47	12	12	0	0	2	0	0	0	0	0	43	0	10	0	0	0	0	0	24	24	0	0	0	0	0	0	3	91	3	0	53	1	1	2	0	28	0	5	31	15	37	10	2	0	0	0	6	64
P. sp. Ma4	0	0	3	0	0	0	0	0	0	0	0	5	0	0	0	0	0	0	0	0	2	0	0	0	0	0	0	0	0	0	0	0	0	0	1	0	0	0	0	12	5	94	0	0	0	0	0	0	1
Pseuduvarus sp. Ma1	0	0	0	0	0	0	0	0	0	0	0	0	0	0	0	0	0	0	0	0	0	0	0	0	0	0	0	0	0	0	0	0	0	0	0	0	0	0	0	0	0	0	0	0	0	0	0	0	0
Uvarus betsimisarakus	0	0	0	0	0	0	0	0	0	0	0	0	0	0	0	0	0	0	0	0	0	0	0	0	0	0	0	0	0	0	0	0	0	0	0	0	0	0	0	0	0	0	0	0	0	0	0	0	0
U. rivulorum	0	0	0	0	0	0	0	0	0	0	0	0	0	0	0	0	0	0	0	0	0	0	0	0	0	0	0	0	0	0	0	0	0	0	0	0	0	0	0	0	0	0	0	0	0	0	0	0	0
Yola costipennis	0	0	0	0	0	0	0	0	0	0	0	0	0	0	0	0	0	0	0	0	0	0	0	0	0	0	0	0	0	0	0	0	0	0	0	0	0	0	0	0	0	0	0	0	0	0	0	0	0
Hydrovatus acuminatus	1	0	0	0	0	0	0	0	0	0	0	0	0	0	0	0	0	0	0	0	0	0	0	0	0	0	0	0	0	0	0	0	0	1	0	0	0	0	0	0	0	0	0	0	0	0	0	0	0
H. capnius	0	0	0	0	0	0	0	0	0	0	0	0	0	0	0	0	0	0	0	0	0	0	0	0	0	0	0	0	0	0	0	0	0	0	0	0	0	0	0	0	0	0	0	0	0	0	0	0	0
H. crassicornis	0	0	0	0	0	0	0	0	0	0	0	0	0	0	0	0	0	0	0	0	0	0	0	0	0	0	0	0	0	0	0	0	0	0	0	0	0	0	0	0	0	0	0	0	0	0	0	0	0
H. cruentatus	0	0	0	0	0	0	0	0	0	0	0	0	0	0	0	0	0	0	0	0	0	0	0	0	0	0	0	0	0	0	0	0	0	0	0	0	0	0	0	0	0	0	0	0	0	0	0	0	0
H. dentatus	0	0	0	0	0	0	0	0	0	0	0	0	0	0	0	0	0	0	0	0	0	0	0	0	0	0	0	0	0	0	0	0	0	0	0	0	0	0	0	0	0	0	0	0	0	0	0	0	0
H. otiosus	0	0	0	0	0	0	0	0	0	0	0	0	0	0	0	0	0	0	0	0	0	0	0	0	0	0	0	0	0	0	0	0	0	0	0	0	0	0	0	0	0	0	0	0	0	0	0	0	0
H. parvulus	0	0	0	0	0	0	0	0	0	0	0	0	0	0	0	0	0	0	0	0	0	0	0	0	0	0	0	0	0	0	0	0	2	0	0	0	0	0	0	0	0	0	0	0	0	0	0	0	0
H. pictulus	0	0	0	0	0	0	0	0	0	0	0	0	0	0	0	0	0	0	0	0	0	0	0	0	0	0	0	0	0	0	0	0	0	0	0	0	0	0	0	0	0	0	0	0	0	0	0	0	0
H. testudinarius	0	0	0	0	0	0	0	0	0	0	0	0	0	0	0	0	0	0	0	0	0	0	0	0	0	0	0	0	0	0	0	0	0	0	0	0	0	0	0	0	0	0	0	0	0	0	0	0	0
H. sp. Ma7	0	0	0	0	0	0	0	0	0	0	0	0	0	0	0	0	0	0	0	0	0	0	0	0	0	0	0	0	0	0	0	0	0	0	0	0	0	0	0	0	0	0	0	0	0	0	0	0	0
Hyphydrus separandus	10	2	138	0	0	11	0	1	1	0	0	8	0	1	0	0	2	0	0	4	14	0	0	0	0	0	1	0	2	0	0	6	0	0	0	0	0	0	0	1	0	3	0	0	0	0	0	0	1
H. stipes	0	0	0	0	0	0	0	0	0	0	0	0	0	0	0	0	0	0	0	0	1	0	0	0	0	0	0	0	0	0	0	0	0	0	0	0	0	0	0	0	0	0	0	0	0	0	0	0	0
Methles sp. Ma1	0	0	0	0	0	0	0	0	0	0	0	0	0	0	0	0	0	0	0	0	0	0	0	0	0	0	0	0	0	0	0	0	0	7	0	0	0	0	0	0	0	0	0	0	0	0	0	0	0
M. sp. Ma5	0	0	0	0	0	0	0	0	0	0	0	0	0	0	0	0	0	0	0	0	0	0	0	0	0	0	0	0	0	0	0	0	1	1	0	0	0	0	0	0	0	0	0	0	0	0	0	0	0
Africophilus bartolozzii	0	0	0	0	0	1	16	0	0	0	0	0	0	0	0	0	0	0	0	0	0	0	0	0	0	0	0	1	0	0	1	0	0	0	0	0	0	0	0	0	0	0	0	0	0	0	0	0	0
A. nesiotes	0	0	14	0	0	1	0	0	0	0	2	7	0	0	0	0	0	1	0	0	0	0	0	0	0	0	0	0	0	0	1	2	0	0	0	0	0	0	0	0	0	0	0	0	0	0	0	0	0
Laccophilus addendus	0	0	1	0	0	0	0	0	47	0	0	0	0	0	0	0	3	1	0	0	0	0	0	0	0	0	0	0	0	1	0	0	0	0	0	0	0	0	0	0	0	0	0	0	0	0	0	0	0
L. flaveolus	0	0	0	0	0	0	0	0	0	0	0	0	0	0	0	0	0	0	0	0	0	0	0	0	0	0	0	0	0	0	0	0	0	0	0	0	0	0	0	0	0	0	0	0	0	0	0	0	0
L. insularum	0	0	4	0	0	0	0	0	0	0	0	0	0	0	0	0	0	0	0	0	0	0	0	0	0	0	0	0	0	0	0	0	0	0	0	0	0	0	0	0	0	0	0	0	0	0	0	0	0
L. luctuosus	0	0	0	0	0	0	0	0	0	0	0	0	0	0	0	0	0	0	0	0	0	0	0	0	0	0	0	0	0	0	0	0	0	0	0	0	0	0	0	0	0	0	0	0	0	0	0	0	0
L. makay	15	3	17	3	2	20	0	6	0	0	0	19	5	2	0	0	33	2	0	8	1	7	20	22	5	6	23	11	0	19	6	0	0	1	68	7	10	0	21	130	26	111	108	99	0	0	0	9	106
L. pallescens	0	0	0	0	0	0	0	0	0	0	0	0	0	0	0	0	0	0	0	0	0	0	0	0	0	0	0	0	0	0	0	0	0	0	0	0	0	0	0	0	0	0	0	0	0	0	0	0	0
L. posticus	1	3	0	0	0	0	0	0	8	0	0	0	0	0	1	0	0	0	0	1	0	0	0	0	0	0	0	0	0	0	0	3	0	1	0	0	0	0	0	0	0	0	0	0	0	0	0	0	1
L. rivulosus	0	0	0	0	0	0	0	0	0	0	0	0	0	0	0	0	0	0	0	0	0	0	0	0	0	0	0	0	0	0	0	0	0	0	0	0	0	0	0	0	0	0	0	0	0	0	0	0	0
L. seyrigi	0	0	0	0	0	0	0	0	0	0	0	0	0	0	0	0	0	0	0	0	0	0	0	0	0	0	0	0	0	0	0	0	0	0	0	0	0	0	0	0	0	0	0	0	0	0	0	0	0
L. transversovittatus	0	0	0	0	0	0	0	0	0	2	0	0	0	0	0	0	0	1	0	0	0	0	0	0	0	0	0	0	0	0	0	0	0	0	0	0	0	0	0	0	0	1	0	0	0	0	0	0	0
L. sp. Ma19	0	0	0	0	0	0	0	0	0	0	0	0	0	0	0	0	0	0	0	0	0	0	0	0	0	0	0	0	0	0	0	0	0	0	0	0	0	0	0	0	0	0	0	0	0	0	0	0	0
Neptosternus oblongus	0	0	88	0	0	0	0	0	0	0	0	0	0	0	0	0	0	0	0	0	0	0	0	0	0	0	0	0	0	0	0	0	0	0	0	0	0	0	0	0	0	0	0	0	0	0	0	0	0
Philaccolus elongatus	0	0	0	0	0	0	0	0	0	0	0	0	0	0	0	0	0	0	0	0	0	0	0	0	0	0	0	0	0	0	0	0	0	0	0	0	0	0	0	0	0	0	0	0	0	0	0	0	0
[truncated: 2 more columns]

## Sheet: ab_for
species	MAK-8	MAK-10	MAK-13	MAK-14	MAK-15	MAK-16	MAK-26	MAK-27	MAK-30	MAK-33	MAK-34	MAK-35	MAK-36	MAK-37	MAK-38	MAK-39	MAK-40	MAK-44	MAK-56	MAK-57	MAK-58	MAK-59
Dineutus proximus	0	0	2	5	0	0	0	11	1	0	0	1	0	4	0	0	7	0	0	0	0	6	37
D. sinuosipennis	0	0	0	0	0	0	0	5	0	0	0	0	0	7	0	0	3	0	0	0	1	0	16
Orectogyrus vicinus	0	0	0	0	1	0	0	0	0	0	0	0	5	13	0	0	1	0	0	0	0	0	20
Peltodytes quadratus	0	0	0	0	0	0	0	0	0	0	0	0	0	0	0	0	0	0	0	0	0	0	0
Canthydrus concolor	0	0	0	0	0	0	0	0	0	0	0	0	0	0	0	0	0	0	0	0	0	0	0
C. flavosignatus	0	0	0	0	0	0	0	0	0	0	0	0	0	0	0	0	0	0	0	0	0	0	0
C. guttula	0	0	0	0	0	0	0	0	0	0	0	0	0	0	3	0	4	0	0	0	0	0	7
C. sp. Ma5	0	0	0	0	0	0	0	0	0	0	0	0	0	0	0	0	0	0	0	0	0	0	0
Neohydrocoptus seriatus	0	0	0	0	0	0	0	0	0	0	0	0	0	0	1	0	0	6	0	0	0	0	7
N. sp. Ma3	0	0	0	0	0	0	0	0	0	0	0	0	0	0	0	0	0	2	5	0	0	0	7
Sternocanthus fabiennae	0	0	0	0	0	0	0	0	0	0	0	0	0	0	0	0	0	0	0	0	0	0	0
Synchortus asperatus	0	0	0	0	0	0	0	0	0	0	0	0	0	0	0	0	0	0	0	0	0	0	0
Copelatus acamas	0	0	0	1	0	0	0	0	20	0	8	3	0	0	0	1	0	0	0	0	0	112	145
C. andobonicus	0	0	0	0	0	0	0	0	0	2	0	0	0	0	0	0	0	0	0	1	0	0	3
C. polystrigus	0	0	0	0	0	0	0	0	0	4	0	0	0	0	0	0	0	81	11	37	1	0	134
C. ruficapillus	1	16	0	0	0	2	0	0	0	2	1	4	0	0	4	17	0	0	0	0	0	0	47
C. vigintistriatus	0	0	0	0	0	0	0	0	0	0	0	0	0	0	0	0	0	5	1	0	0	0	6
C. sp. Ma19	0	0	0	0	0	0	0	0	0	0	0	0	0	0	0	0	0	1	0	0	0	0	1
C. sp. Ma20	0	0	0	0	0	0	0	0	0	0	0	0	0	0	0	0	0	0	0	0	0	0	0
Madaglymbus fairmairei	0	10	0	0	1	2	0	0	0	0	0	1	0	1	0	6	1	0	0	0	0	0	22
Cybister cinctus	0	0	0	0	0	0	0	0	0	0	0	0	0	0	0	0	0	0	0	0	0	0	0
C. operosus	0	0	0	0	0	0	0	0	0	0	0	0	0	0	0	0	0	0	0	0	0	0	0
Rhantaticus congestus	0	0	0	0	0	0	0	0	0	0	0	0	0	0	0	0	0	0	0	0	0	0	0
Eretes griseus	0	0	0	0	0	0	0	0	0	0	0	0	0	0	0	0	0	0	0	0	0	0	0
Hydaticus dorsiger	0	0	0	1	0	0	0	0	0	0	0	0	0	0	0	0	0	0	0	0	0	0	1
H. exclamationis	0	0	0	0	0	0	0	0	0	0	0	0	0	0	0	0	0	0	0	0	0	0	0
H. petitii	0	0	0	0	0	0	0	0	0	0	0	0	0	0	0	0	0	0	0	0	0	0	0
H. servillianus	0	0	0	0	0	0	0	0	0	0	0	0	0	0	0	0	2	0	0	0	0	0	2
H. sobrinus	1	0	0	0	0	0	0	0	0	0	0	0	0	0	0	0	0	0	0	0	0	2	3
Bidessus longistriga	0	0	0	0	0	0	0	0	0	0	0	0	0	0	0	0	0	0	0	0	0	0	0
B. perexiguus	0	0	0	0	0	0	0	0	0	0	0	0	0	0	0	0	0	0	0	0	0	0	0
Clypeodytes concivis	0	0	0	0	0	0	0	0	0	0	0	0	0	0	0	0	0	0	0	0	0	0	0
C. insularis	0	0	0	0	0	0	0	0	0	0	0	0	0	0	0	0	0	0	0	0	0	0	0
C. sp. Ma3	0	0	0	0	0	0	0	0	0	0	0	0	0	0	0	0	0	0	0	0	0	0	0
Hydroglyphus capitatus	0	0	0	0	0	0	0	0	0	0	0	0	0	0	0	0	0	0	0	0	0	0	0
H. geminodes	0	0	0	0	0	0	0	0	0	0	0	0	0	0	0	0	0	0	0	0	0	0	0
H. plagiatus	0	0	0	0	0	0	0	0	0	0	0	0	0	0	0	0	0	0	0	0	0	0	0
Liodessus luteopictus	0	0	0	0	0	1	0	0	0	0	0	0	0	0	0	0	0	0	0	0	0	0	1
Pachynectes costulifer	0	0	0	0	0	0	0	0	0	0	0	0	0	0	0	0	0	0	0	0	0	0	0
P. sp. Ma1	2	0	0	43	0	10	0	0	0	0	0	0	3	91	3	0	53	1	0	0	6	64	276
P. sp. Ma4	0	0	0	5	0	0	0	0	0	0	0	0	0	0	0	0	0	0	0	0	0	1	6
Pseuduvarus sp. Ma1	0	0	0	0	0	0	0	0	0	0	0	0	0	0	0	0	0	0	0	0	0	0	0
Uvarus betsimisarakus	0	0	0	0	0	0	0	0	0	0	0	0	0	0	0	0	0	0	0	0	0	0	0
U. rivulorum	0	0	0	0	0	0	0	0	0	0	0	0	0	0	0	0	0	0	0	0	0	0	0
Yola costipennis	0	0	0	0	0	0	0	0	0	0	0	0	0	0	0	0	0	0	0	0	0	0	0
Hydrovatus acuminatus	0	0	0	0	0	0	0	0	0	0	0	0	0	0	0	0	0	1	0	0	0	0	1
H. capnius	0	0	0	0	0	0	0	0	0	0	0	0	0	0	0	0	0	0	0	0	0	0	0
H. crassicornis	0	0	0	0	0	0	0	0	0	0	0	0	0	0	0	0	0	0	0	0	0	0	0
H. cruentatus	0	0	0	0	0	0	0	0	0	0	0	0	0	0	0	0	0	0	0	0	0	0	0
H. dentatus	0	0	0	0	0	0	0	0	0	0	0	0	0	0	0	0	0	0	0	0	0	0	0
H. otiosus	0	0	0	0	0	0	0	0	0	0	0	0	0	0	0	0	0	0	0	0	0	0	0
H. parvulus	0	0	0	0	0	0	0	0	0	0	0	0	0	0	0	0	0	0	0	0	0	0	0
H. pictulus	0	0	0	0	0	0	0	0	0	0	0	0	0	0	0	0	0	0	0	0	0	0	0
H. testudinarius	0	0	0	0	0	0	0	0	0	0	0	0	0	0	0	0	0	0	0	0	0	0	0
H. sp. Ma7	0	0	0	0	0	0	0	0	0	0	0	0	0	0	0	0	0	0	0	0	0	0	0
Hyphydrus separandus	11	1	0	8	0	1	0	0	0	0	0	1	0	2	0	0	6	0	0	0	0	1	31
H. stipes	0	0	0	0	0	0	0	0	0	0	0	0	0	0	0	0	0	0	0	0	0	0	0
Methles sp. Ma1	0	0	0	0	0	0	0	0	0	0	0	0	0	0	0	0	0	7	0	0	0	0	7
M. sp. Ma5	0	0	0	0	0	0	0	0	0	0	0	0	0	0	0	0	0	1	0	0	0	0	1
Africophilus bartolozzii	1	0	0	0	0	0	0	0	0	0	0	0	1	0	0	1	0	0	0	0	0	0	3
A. nesiotes	1	0	2	7	0	0	1	0	0	0	0	0	0	0	0	1	2	0	0	0	0	0	14
Laccophilus addendus	0	0	0	0	0	0	1	0	0	0	0	0	0	0	1	0	0	0	0	0	0	0	2
L. flaveolus	0	0	0	0	0	0	0	0	0	0	0	0	0	0	0	0	0	0	0	0	0	0	0
L. insularum	0	0	0	0	0	0	0	0	0	0	0	0	0	0	0	0	0	0	0	0	0	0	0
L. luctuosus	0	0	0	0	0	0	0	0	0	0	0	0	0	0	0	0	0	0	0	0	0	0	0
L. makay	20	6	0	19	5	2	2	0	7	5	6	23	11	0	19	6	0	1	0	0	9	106	247
L. pallescens	0	0	0	0	0	0	0	0	0	0	0	0	0	0	0	0	0	0	0	0	0	0	0
L. posticus	0	0	0	0	0	0	0	0	0	0	0	0	0	0	0	0	3	1	0	0	0	1	5
L. rivulosus	0	0	0	0	0	0	0	0	0	0	0	0	0	0	0	0	0	0	0	0	0	0	0
L. seyrigi	0	0	0	0	0	0	0	0	0	0	0	0	0	0	0	0	0	0	0	0	0	0	0
L. transversovittatus	0	0	0	0	0	0	1	0	0	0	0	0	0	0	0	0	0	0	0	0	0	0	1
L. sp. Ma19	0	0	0	0	0	0	0	0	0	0	0	0	0	0	0	0	0	0	0	0	0	0	0
Neptosternus oblongus	0	0	0	0	0	0	0	0	0	0	0	0	0	0	0	0	0	0	0	0	0	0	0
Philaccolus elongatus	0	0	0	0	0	0	0	0	0	0	0	0	0	0	0	0	0	0	0	0	0	0	0

## Sheet: ab_semi
species	MAK-3	MAK-4	MAK-5	MAK-7	MAK-12	MAK-17	MAK-24	MAK-25	MAK-28	MAK-29	MAK-31	MAK-32	MAK-43	MAK-45	MAK-46	MAK-47	MAK-48	MAK-49	MAK-50	MAK-51	MAK-52	MAK-53	MAK-54	MAK-55	MAK-60
Dineutus proximus	0	0	5	0	0	0	3	0	0	0	0	0	0	0	0	0	6	0	0	0	0	0	0	3	0	17
D. sinuosipennis	0	0	0	0	0	0	0	0	0	0	0	0	0	0	0	0	1	0	0	0	6	0	0	14	0	21
Orectogyrus vicinus	0	0	0	0	0	0	0	0	0	0	0	0	0	0	0	0	4	0	0	0	0	0	0	0	0	4
Peltodytes quadratus	0	0	0	0	0	0	0	0	0	0	0	0	0	0	0	0	0	0	0	0	0	0	0	0	0	0
Canthydrus concolor	0	0	0	0	0	0	0	0	0	0	0	0	0	0	0	0	0	0	0	0	0	0	0	0	0	0
C. flavosignatus	0	0	0	0	0	0	0	0	0	0	0	0	0	0	0	0	0	0	0	0	0	0	0	0	0	0
C. guttula	0	0	0	0	0	0	0	0	0	0	0	0	0	0	0	0	0	0	0	0	0	0	0	0	28	28
C. sp. Ma5	0	0	0	0	0	0	0	0	0	0	0	0	0	0	0	0	0	0	0	0	0	0	0	0	4	4
Neohydrocoptus seriatus	0	0	0	0	0	0	0	0	0	0	0	0	18	0	0	0	0	0	0	0	0	0	0	0	26	44
N. sp. Ma3	0	0	0	0	0	0	0	0	0	0	0	0	5	0	0	0	0	0	0	0	0	0	0	0	0	5
Sternocanthus fabiennae	0	0	0	0	0	0	0	0	0	0	0	0	0	0	0	0	0	0	0	0	0	0	0	0	0	0
Synchortus asperatus	0	0	0	0	0	0	0	0	0	0	0	0	0	0	0	0	0	0	0	0	0	0	0	0	0	0
Copelatus acamas	0	0	0	3	0	0	0	0	0	0	0	35	0	67	17	1	0	70	13	0	1	16	12	0	0	235
C. andobonicus	0	0	0	0	4	0	0	0	0	0	0	0	0	0	0	0	0	0	0	0	0	0	0	0	0	4
C. polystrigus	0	0	0	0	78	0	0	0	0	0	0	0	0	0	0	0	0	0	0	0	0	0	0	0	0	78
C. ruficapillus	9	11	0	1	10	0	0	2	8	1	0	0	0	1	0	0	0	0	2	0	0	0	0	0	0	45
C. vigintistriatus	0	0	0	0	0	0	0	0	0	0	0	0	0	0	0	0	0	0	0	0	0	0	0	0	2	2
C. sp. Ma19	0	0	0	0	0	0	0	0	0	0	0	0	0	0	0	0	0	0	0	0	0	0	0	0	0	0
C. sp. Ma20	0	0	0	0	0	0	0	0	0	0	0	0	0	0	2	0	0	0	1	0	0	0	0	0	0	3
Madaglymbus fairmairei	3	0	0	0	4	0	0	10	0	4	0	0	0	0	0	0	0	0	0	0	0	0	0	0	0	21
Cybister cinctus	0	0	0	0	0	0	0	0	0	0	0	0	0	0	0	0	0	0	0	0	0	0	0	0	0	0
C. operosus	0	0	0	0	0	0	0	0	0	0	0	0	0	0	0	0	0	0	1	0	0	0	0	0	0	1
Rhantaticus congestus	0	0	0	0	0	0	0	0	0	0	0	0	0	0	0	0	0	0	0	0	0	0	0	0	0	0
Eretes griseus	0	0	0	0	0	0	0	0	0	0	0	0	0	0	0	0	0	0	0	0	0	0	0	0	0	0
Hydaticus dorsiger	0	0	0	0	2	0	0	0	0	0	0	0	0	0	0	0	0	0	0	0	0	0	0	0	0	2
H. exclamationis	0	0	0	0	0	0	0	0	0	0	0	0	0	0	0	0	0	0	0	0	0	0	0	0	0	0
H. petitii	0	0	0	0	0	0	0	0	0	0	0	0	0	0	0	0	0	0	0	0	1	0	0	0	0	1
H. servillianus	0	0	0	0	0	0	0	0	0	0	0	0	0	0	0	0	0	0	0	0	0	0	0	0	0	0
H. sobrinus	0	0	0	0	0	0	0	0	0	0	0	0	0	0	0	0	0	0	2	0	0	2	1	0	0	5
Bidessus longistriga	0	0	0	0	0	0	0	0	0	0	0	0	0	0	0	0	0	0	0	0	0	0	0	0	1	1
B. perexiguus	0	0	0	0	0	1	0	0	0	0	0	0	0	0	0	0	0	0	0	0	0	0	0	0	3	4
Clypeodytes concivis	0	0	0	0	0	0	0	0	0	0	0	0	0	0	0	0	0	0	0	0	0	0	0	0	0	0
C. insularis	0	0	0	0	0	0	0	0	0	0	0	0	0	0	0	0	0	0	0	0	0	0	0	0	0	0
C. sp. Ma3	0	0	0	0	0	0	0	0	0	0	0	0	0	0	0	0	0	0	0	0	0	0	0	0	0	0
Hydroglyphus capitatus	0	2	0	0	0	0	0	0	0	0	0	0	0	0	0	0	0	0	0	0	0	0	0	0	0	2
H. geminodes	0	9	0	0	0	12	0	0	0	0	0	0	0	0	0	0	0	0	0	0	0	0	0	0	0	21
H. plagiatus	0	0	0	0	0	1	0	0	0	0	0	0	0	0	0	0	0	0	0	0	0	0	0	0	0	1
Liodessus luteopictus	0	0	0	0	0	0	0	0	0	0	0	0	0	0	0	0	0	0	0	0	0	0	0	0	0	0
Pachynectes costulifer	0	0	0	0	0	0	0	0	0	0	0	0	0	0	0	0	0	0	0	0	0	0	0	0	0	0
P. sp. Ma1	47	12	12	0	0	0	0	0	24	24	0	0	1	2	0	28	0	5	31	15	37	10	2	0	0	250
P. sp. Ma4	0	0	3	0	0	0	0	0	0	2	0	0	0	1	0	0	0	0	12	5	94	0	0	0	0	117
Pseuduvarus sp. Ma1	0	0	0	0	0	0	0	0	0	0	0	0	0	0	0	0	0	0	0	0	0	0	0	0	0	0
Uvarus betsimisarakus	0	0	0	0	0	0	0	0	0	0	0	0	0	0	0	0	0	0	0	0	0	0	0	0	0	0
U. rivulorum	0	0	0	0	0	0	0	0	0	0	0	0	0	0	0	0	0	0	0	0	0	0	0	0	4	4
Yola costipennis	0	0	0	0	0	0	0	0	0	0	0	0	0	0	0	0	0	0	0	0	0	0	0	0	1	1
Hydrovatus acuminatus	1	0	0	0	0	0	0	0	0	0	0	0	0	0	0	0	0	0	0	0	0	0	0	0	3	4
H. capnius	0	0	0	0	0	0	0	0	0	0	0	0	0	0	0	0	0	0	0	0	0	0	0	0	0	0
H. crassicornis	0	0	0	0	0	0	0	0	0	0	0	0	0	0	0	0	0	0	0	0	0	0	0	0	1	1
H. cruentatus	0	0	0	0	0	0	0	0	0	0	0	0	0	0	0	0	0	0	0	0	0	0	0	0	0	0
H. dentatus	0	0	0	0	0	0	0	0	0	0	0	0	0	0	0	0	0	0	0	0	0	0	0	0	0	0
H. otiosus	0	0	0	0	0	0	0	0	0	0	0	0	0	0	0	0	0	0	0	0	0	0	0	0	0	0
H. parvulus	0	0	0	0	0	0	0	0	0	0	0	0	2	0	0	0	0	0	0	0	0	0	0	0	0	2
H. pictulus	0	0	0	0	0	0	0	0	0	0	0	0	0	0	0	0	0	0	0	0	0	0	0	0	0	0
H. testudinarius	0	0	0	0	0	0	0	0	0	0	0	0	0	0	0	0	0	0	0	0	0	0	0	0	0	0
H. sp. Ma7	0	0	0	0	0	0	0	0	0	0	0	0	0	0	0	0	0	0	0	0	0	0	0	0	0	0
Hyphydrus separandus	10	2	138	0	0	0	0	2	4	14	0	0	0	0	0	0	0	0	1	0	3	0	0	0	0	174
H. stipes	0	0	0	0	0	0	0	0	0	1	0	0	0	0	0	0	0	0	0	0	0	0	0	0	0	1
Methles sp. Ma1	0	0	0	0	0	0	0	0	0	0	0	0	0	0	0	0	0	0	0	0	0	0	0	0	3	3
M. sp. Ma5	0	0	0	0	0	0	0	0	0	0	0	0	1	0	0	0	0	0	0	0	0	0	0	0	4	5
Africophilus bartolozzii	0	0	0	0	0	0	0	0	0	0	0	0	0	0	0	0	0	0	0	0	0	0	0	0	0	0
A. nesiotes	0	0	14	0	0	0	0	0	0	0	0	0	0	0	0	0	0	0	0	0	0	0	0	0	0	14
Laccophilus addendus	0	0	1	0	0	0	0	3	0	0	0	0	0	0	0	0	0	0	0	0	0	0	0	0	0	4
L. flaveolus	0	0	0	0	0	0	0	0	0	0	0	0	0	0	0	0	0	0	0	0	0	0	0	0	0	0
L. insularum	0	0	4	0	0	0	0	0	0	0	0	0	0	0	0	0	0	0	0	0	0	0	0	0	0	4
L. luctuosus	0	0	0	0	0	0	0	0	0	0	0	0	0	0	0	0	0	0	0	0	0	0	0	0	0	0
L. makay	15	3	17	2	0	0	0	33	8	1	20	22	0	68	7	10	0	21	130	26	111	108	99	0	0	701
L. pallescens	0	0	0	0	0	0	0	0	0	0	0	0	0	0	0	0	0	0	0	0	0	0	0	0	0	0
L. posticus	1	3	0	0	0	1	0	0	1	0	0	0	0	0	0	0	0	0	0	0	0	0	0	0	10	16
L. rivulosus	0	0	0	0	0	0	0	0	0	0	0	0	0	0	0	0	0	0	0	0	0	0	0	0	0	0
L. seyrigi	0	0	0	0	0	0	0	0	0	0	0	0	0	0	0	0	0	0	0	0	0	0	0	0	0	0
L. transversovittatus	0	0	0	0	2	0	0	0	0	0	0	0	0	0	0	0	0	0	0	0	1	0	0	0	0	3
L. sp. Ma19	0	0	0	0	0	0	0	0	0	0	0	0	0	0	0	0	0	0	0	0	0	0	0	0	0	0
Neptosternus oblongus	0	0	88	0	0	0	0	0	0	0	0	0	0	0	0	0	0	0	0	0	0	0	0	0	0	88
Philaccolus elongatus	0	0	0	0	0	0	0	0	0	0	0	0	0	0	0	0	0	0	0	0	0	0	0	0	0	0

## Sheet: ab_unfor
species	MAK-1	MAK-2	MAK-6	MAK-11	MAK-18	MAK-19	MAK-20	MAK-21	MAK-22	MAK-23	MAK-41	MAK-42	MAK-61	MAK-62
Dineutus proximus	0	0	0	0	0	0	0	0	0	0	0	0	0	0	0
D. sinuosipennis	0	0	0	0	0	0	0	0	0	0	0	0	0	0	0
Orectogyrus vicinus	0	0	0	0	0	0	0	0	0	0	0	0	0	0	0
Peltodytes quadratus	0	0	0	0	0	1	0	0	0	0	1	0	0	0	2
Canthydrus concolor	0	1	0	0	0	0	0	0	0	0	0	0	0	0	1
C. flavosignatus	0	2	0	0	0	1	0	0	0	0	0	0	0	0	3
C. guttula	3	1	0	1	0	91	1	0	0	0	6	12	1	0	116
C. sp. Ma5	0	0	0	0	0	0	1	0	0	0	0	0	3	0	4
Neohydrocoptus seriatus	0	2	0	1	0	24	0	3	0	20	0	3	2	0	55
N. sp. Ma3	0	0	0	0	0	0	0	0	0	0	0	0	0	0	0
Sternocanthus fabiennae	0	0	0	0	0	5	0	0	0	0	2	0	0	0	7
Synchortus asperatus	0	0	0	0	0	0	0	1	0	0	0	1	0	0	2
Copelatus acamas	0	0	2	0	0	0	0	0	0	0	0	0	0	0	2
C. andobonicus	0	0	0	0	0	0	0	0	0	0	0	0	0	0	0
C. polystrigus	0	0	0	2	0	0	0	0	0	0	0	0	0	0	2
C. ruficapillus	0	0	0	1	0	0	0	0	0	0	0	0	0	0	1
C. vigintistriatus	0	0	0	0	0	0	0	0	0	0	0	0	0	0	0
C. sp. Ma19	0	0	0	0	0	0	0	0	0	0	0	0	0	0	0
C. sp. Ma20	0	0	0	0	0	0	0	0	0	0	0	0	0	0	0
Madaglymbus fairmairei	0	0	0	2	0	0	0	0	0	0	0	0	0	0	2
Cybister cinctus	1	2	0	0	0	4	5	0	0	1	1	0	0	0	14
C. operosus	0	0	0	0	0	0	0	0	0	0	0	0	0	0	0
Rhantaticus congestus	0	1	0	0	0	2	0	0	0	0	1	0	0	0	4
Eretes griseus	0	0	0	2	0	0	0	0	0	0	0	0	0	0	2
Hydaticus dorsiger	0	0	0	2	1	14	0	0	0	1	0	0	0	0	18
H. exclamationis	0	0	0	1	0	0	0	0	0	0	0	0	0	0	1
H. petitii	0	0	0	0	0	0	0	0	0	0	0	0	0	0	0
H. servillianus	1	1	0	0	0	20	0	0	0	4	0	0	7	1	34
H. sobrinus	0	0	0	0	0	0	0	0	0	0	0	0	0	0	0
Bidessus longistriga	1	1	0	0	0	2	0	0	0	0	0	17	1	0	22
B. perexiguus	1	5	0	0	82	29	0	0	0	0	0	0	1	0	118
Clypeodytes concivis	0	6	0	0	0	0	0	0	0	0	0	0	1	0	7
C. insularis	0	0	0	0	0	0	1	0	0	0	0	0	0	0	1
C. sp. Ma3	0	1	0	0	0	0	0	0	0	0	0	0	0	0	1
Hydroglyphus capitatus	33	0	0	0	0	0	0	0	0	0	0	0	5	0	38
H. geminodes	9	3	0	0	1	7	0	0	0	0	0	0	5	0	25
H. plagiatus	0	0	0	0	0	0	0	0	0	0	0	0	0	0	0
Liodessus luteopictus	0	0	0	0	0	0	0	0	0	0	0	0	0	0	0
Pachynectes costulifer	58	0	0	0	0	0	2	0	2	0	0	0	0	0	62
P. sp. Ma1	0	7	0	0	0	0	0	0	0	0	0	0	0	0	7
P. sp. Ma4	0	0	0	0	0	0	0	0	0	0	0	0	0	0	0
Pseuduvarus sp. Ma1	0	1	0	0	0	0	0	0	0	0	0	0	1	0	2
Uvarus betsimisarakus	0	0	0	0	0	2	0	0	0	0	0	0	0	0	2
U. rivulorum	1	2	0	0	1	6	0	0	0	0	0	0	0	0	10
Yola costipennis	7	0	0	0	0	4	6	0	0	0	4	1	0	3	25
Hydrovatus acuminatus	2	12	0	0	0	3	0	3	0	1	0	0	2	1	24
H. capnius	0	1	0	0	0	0	0	0	0	0	0	2	0	0	3
H. crassicornis	0	0	0	0	0	0	0	0	0	0	0	2	2	0	4
H. cruentatus	0	1	0	0	0	0	0	0	0	0	0	1	0	0	2
H. dentatus	0	1	0	0	0	0	0	0	0	0	0	0	0	0	1
H. otiosus	0	5	0	0	0	0	0	0	0	0	0	0	0	4	9
H. parvulus	0	2	0	0	0	0	0	0	0	0	0	0	3	0	5
H. pictulus	0	6	0	0	0	0	0	0	0	0	0	0	0	1	7
H. testudinarius	0	10	0	0	0	0	0	0	0	0	0	0	0	0	10
H. sp. Ma7	0	2	0	0	0	0	0	0	0	0	0	0	0	0	2
Hyphydrus separandus	0	0	0	1	0	0	0	0	0	0	0	0	0	0	1
H. stipes	0	0	0	0	0	0	0	0	0	0	0	0	0	0	0
Methles sp. Ma1	0	0	0	0	0	0	0	0	0	0	0	0	0	0	0
M. sp. Ma5	0	1	0	0	0	0	0	0	0	0	0	6	43	4	54
Africophilus bartolozzii	0	0	0	0	0	0	0	0	0	0	0	0	0	0	0
A. nesiotes	0	0	0	0	0	0	0	0	0	0	0	0	0	0	0
Laccophilus addendus	0	1	0	47	0	3	0	0	0	0	0	0	0	2	53
L. flaveolus	0	1	0	0	0	0	0	0	0	0	0	0	0	0	1
L. insularum	0	0	0	0	0	0	0	0	0	0	0	0	0	0	0
L. luctuosus	0	0	0	0	0	0	0	2	0	0	0	0	0	0	2
L. makay	0	0	3	0	0	0	0	0	0	0	0	0	0	0	3
L. pallescens	1	13	0	0	1	1	0	0	0	0	0	0	0	0	16
L. posticus	5	1	0	8	1	243	0	1	0	12	25	37	0	7	340
L. rivulosus	0	1	0	0	0	9	0	0	0	0	0	0	0	0	10
L. seyrigi	0	1	0	0	0	0	0	0	0	0	0	0	0	0	1
L. transversovittatus	0	0	0	0	0	0	0	0	0	0	0	0	0	0	0
L. sp. Ma19	0	0	0	0	0	0	0	1	0	0	0	0	0	0	1
Neptosternus oblongus	0	0	0	0	0	0	0	0	0	0	0	0	0	0	0
Philaccolus elongatus	0	1	0	0	0	0	0	0	0	0	0	0	0	0	1

## Sheet: abondance_RFO
species	status	all samplings (n=87)	inner massif sites (n=73)	peripheral sites (n=14)	forested sites (n=35)	semi-forested sites (n=34)	non forested sites (n=18)
Dineutus proximus	E	54	54	0	37	17	0
D. sinuosipennis	E	37	37	0	16	21	0
Orectogyrus vicinus	E	24	24	0	20	4	0
Peltodytes quadratus	E	2	0	2	0	0	2
Canthydrus concolor	E	1	0	1	0	0	1
C. flavosignatus	W	3	0	3	0	0	3
C. guttula	E*	151	36	115	7	28	116
C. sp. Ma5	?	8	4	4	0	4	4
Neohydrocoptus seriatus	W	106	52	54	7	44	55
N. sp. Ma3	?	12	12	0	7	5	0
Sternocanthus fabiennae	E	7	0	7	0	0	7
Synchortus asperatus	E	2	0	2	0	0	2
Copelatus acamas	E	382	382	0	145	235	2
C. andobonicus	E	7	7	0	3	4	0
C. polystrigus	W	214	214	0	134	78	2
C. ruficapillus	E	93	93	0	47	45	1
C. vigintistriatus	E*	8	8	0	6	2	0
C. sp. Ma19	E	1	1	0	1	0	0
C. sp. Ma20	E	3	3	0	0	3	0
Madaglymbus fairmairei	E	45	45	0	22	21	2
Cybister cinctus	E	14	0	14	0	0	14
C. operosus	E	1	1	0	0	1	0
Rhantaticus congestus	W	4	0	4	0	0	4
Eretes griseus	W	2	2	0	0	0	2
Hydaticus dorsiger	W	21	5	16	1	2	18
H. exclamationis	W	1	1	0	0	0	1
H. petitii	E	1	1	0	0	1	0
H. servillianus	W	36	2	34	2	0	34
H. sobrinus	E*	8	8	0	3	5	0
Bidessus longistriga	E	23	1	22	0	1	22
B. perexiguus	E	122	4	118	0	4	118
Clypeodytes concivis	E	7	0	7	0	0	7
C. insularis	E	1	0	1	0	0	1
C. sp. Ma3	?	1	0	1	0	0	1
Hydroglyphus capitatus	E*	40	2	38	0	2	38
H. geminodes	W	46	21	25	0	21	25
H. plagiatus	E	1	1	0	0	1	0
Liodessus luteopictus	E*	1	1	0	1	0	0
Pachynectes costulifer	E	62	0	62	0	0	62
P. sp. Ma1	E	533	526	7	276	250	7
P. sp. Ma4	E	123	123	0	6	117	0
Pseuduvarus sp. Ma1	?	2	0	2	0	0	2
Uvarus betsimisarakus	E	2	0	2	0	0	2
U. rivulorum	E	14	4	10	0	4	10
Yola costipennis	E	26	1	25	0	1	25
Hydrovatus acuminatus	W	29	5	24	1	4	24
H. capnius	W	3	0	3	0	0	3
H. crassicornis	E	5	1	4	0	1	4
H. cruentatus	E	2	0	2	0	0	2
H. dentatus	W	1	0	1	0	0	1
H. otiosus	E	9	0	9	0	0	9
H. parvulus	W	7	2	5	0	2	5
H. pictulus	W	7	0	7	0	0	7
H. testudinarius	E	10	0	10	0	0	10
H. sp. Ma7	?	2	0	2	0	0	2
Hyphydrus separandus	E*	206	206	0	31	174	1
H. stipes	E	1	1	0	0	1	0
Methles sp. Ma1	?	10	10	0	7	3	0
M. sp. Ma5	?	60	6	54	1	5	54
Africophilus bartolozzii	E	19	19	0	3	0	0
A. nesiotes	W	28	28	0	14	14	0
Laccophilus addendus	E*	60	54	6	2	4	54
L. flaveolus	W	1	0	1	0	0	1
L. insularum	E	4	4	0	0	4	0
L. luctuosus	E	2	0	2	0	0	2
L. makay	E	951	951	0	247	701	3
L. pallescens	W	16	0	16	0	0	16
L. posticus	E*	361	29	332	5	16	340
L. rivulosus	E	10	0	10	0	0	10
L. seyrigi	E	1	0	1	0	0	1
L. transversovittatus	E	4	4	0	1	3	0
L. sp. Ma19	E	1	0	1	0	0	1
Neptosternus oblongus	E	88	88	0	0	88	0
Philaccolus elongatus	E	1	0	1	0	0	1
